# Supplementary material
Source: publisher site journal article supplement (https://www.dovepress.com/article/399378)
Supplement: Supplementary file 1 [file get_supplementary_file.php]

Table S1. Percentage of missing data for all the variables

| **Variables** | **Percentage of subjects with missing data (%)** |
| --- | --- |
| **Continuous variables** |  |
| Age | 0 |
| BMI | 0 |
| Course of the disease | 2.34 |
| RBC | 0 |
| HB | 0 |
| MCV | 0 |
| MCHC | 0 |
| HCT | 0 |
| WBC | 0 |
| PLT | 0 |
| Folate | 0 |
| Vitamin B12 | 0 |
| tHcy | 1.56 |
| IL-6 | 0.78 |
| TNF-α | 0.78 |
| CRP | 0.78 |
| PHQ-9 (1-9)a | 0 |
| GAD-7 (1-7)a | 0 |
| PHQ-9 (total) | 0 |
| GAD--7 (total) | 0 |
| **Categorical variables** |  |
| Gender | 0 |
| Parental marriage | 0 |
| Father's education level | 3.12 |
| Mother's education level | 3.12 |
| Current smoking | 0 |
| Current drinking | 0 |
| Antidepressants or antipsychotics | 0 |
| Family history of psychiatric illness | 0 |

Footnote: a every item of PHQ-9 or GAD-7.
